# Supplementary material
Source: PubMed Central journal article supplement (PMC7730068)
Supplement: NIHMS1548362-supplement-1.pdf [file NIHMS1548362-supplement-1.pdf]

**Supplemental Table 1**

Sociodemographic and Clinical Characteristics of Patients with Stage IV Non-Small Cell Lung Cancer Stratified by Current Immunotherapy vs. Chemo-immunotherapy (N = 60)

|                                        | Immunotherapy     | Chemo-immunotherapy |
|----------------------------------------|-------------------|---------------------|
| <b>Sociodemographics</b>               | n (%) / Mean (SD) | n (%) / Mean (SD)   |
| Age – mean (sd)                        | 63.9 (8.9)        | 60.7 (9.9)          |
| Age ≥70 y.o. <sup>a</sup> –n (%)       | 11 (35.5)         | 4 (14.3)            |
| Female – n (%)                         | 16 (51.6)         | 19 (67.9)           |
| Race – n (%)                           |                   |                     |
| White                                  | 23 (74.2)         | 20 (71.4)           |
| Black                                  | 4 (12.9)          | 7 (25.0)            |
| Asian                                  | 1 (3.2)           | 0 (0)               |
| Other                                  | 1 (3.2)           | 0 (0)               |
| Declined to answer                     | 2 (6.5)           | 0 (0)               |
| Missing                                | 0 (0)             | 1 (3.6)             |
| Hispanic – n (%)                       | 0 (0)             | 2 (7.1)             |
| Rural <sup>b</sup> – n (%)             | 11 (35.5)         | 10 (35.7)           |
| Education – n (%)                      |                   |                     |
| Some HS or less                        | 5 (16.1)          | 4 (14.3)            |
| HS diploma                             | 10 (32.3)         | 6 (21.4)            |
| Some college                           | 14 (45.2)         | 10 (35.7)           |
| College graduate or more               | 2 (6.5)           | 7 (25.0)            |
| Missing                                | 0 (0)             | 1 (3.6)             |
| Household income--n (%)                |                   |                     |
| <\$25K                                 | 13 (41.9)         | 9 (32.1)            |
| \$25K – 49,999                         | 9 (29.0)          | 3 (10.7)            |
| \$50K – 99,999                         | 5 (16.1)          | 2 (7.1)             |
| ≥\$100K                                | 2 (6.5)           | 5 (17.9)            |
| Missing                                | 2 (6.5)           | 9 (32.1)            |
| <b>Clinical</b>                        |                   |                     |
| Cigarette pack years—mean (sd)         | 36.7 (20.6)       | 27.3 (21.5)         |
| Currently smoking <sup>c</sup> --n (%) | 9 (29.0)          | 6 (21.4)            |
| ECOG PS--n (%)                         |                   |                     |
| 0                                      | 2 (6.5)           | 2 (7.1)             |
| 1                                      | 19 (61.3)         | 18 (64.3)           |
| 2                                      | 9 (29.0)          | 7 (25.0)            |
| 3                                      | 1 (3.2)           | 1 (3.6)             |
| De novo stage IV NSCLC--n (%)          | 24 (77.4)         | 22 (78.6)           |
| Current immunotherapy agent--n (%)     |                   |                     |

|                                           |             |             |
|-------------------------------------------|-------------|-------------|
| Pembrolizumab                             |             |             |
| Pembro alone --n                          | 17 (54.8)   | 1 (3.6)     |
| Carboplatin-Pemetrexed--n                 | 0 (0)       | 12 (42.9)   |
| Pemetrexed-Pembrolizumab--n               | 0 (0)       | 13 (46.4)   |
| Pembrolizumab-carboplatin--n              | 0 (0)       | 1 (3.6)     |
| Nivolumab                                 | 13 (41.9)   | 0 (0)       |
| Atezolizumab                              | 1 (3.2)     | 1 (3.6)     |
| Weeks on immunotherapy—mean (sd)          | 34.9 (32.6) | 24.6 (29.4) |
| Other treatments received to date*--n (%) |             |             |
| Chemotherapy                              | 24 (77.4)   | 24 (85.7)   |
| Radiation                                 | 10 (32.3)   | 10 (35.7)   |
| Concurrent chemo-radiotherapy             | 2 (6.5)     | 1 (3.6)     |
| Targeted therapy                          | 3 (9.7)     | 1 (3.6)     |
| Gamma knife                               | 11 (35.5)   | 11 (39.3)   |
| Surgery                                   | 9 (29.0)    | 8 (28.6)    |
| Whole brain radiotherapy                  | 1 (3.2)     | 1 (3.6)     |
| Stereotactic body radiation therapy       | 2 (6.5)     | 3 (10.7)    |
| Craniotomy                                | 7 (22.6)    | 4 (14.3)    |
| At least 1 non-cancer comorbidity – n (%) | 16 (51.6)   | 14 (50.0)   |
| Reimaged for response**--n (%)            |             |             |
| Not yet reimaged                          | 12 (38.7)   | 11 (39.3)   |
| Reimaged: Partial/Complete response       | 6 (19.4)    | 5 (17.9)    |
| Reimaged: Stable disease                  | 12 (38.7)   | 11 (39.3)   |
| Reimaged: Progressive disease             | 1 (3.2)     | 1 (3.6)     |

Note. HS = high school; ECOG PS = Eastern Cooperative Oncology Group Performance Status

<sup>a</sup>  $p = .078$

<sup>b</sup>Rural: Federal Office of Rural Health Policy's eligible ZIP codes (ZIP code with more than 50% of the population residing in a non-metro county or rural census tract included as rural).

<sup>c</sup>Currently smoking = reported smoking a cigarette within the past 7 days.

\*Patients could have multiple prior treatments more so percents total to more than 100

\*\*We intentionally sampled patients who had not yet been reimaged to evaluate treatment response to obtain a sample of patients who were earlier vs. later into treatment.

**Supplemental Table 2.**

Health-Related Global Quality of Life, Function, and Symptom Scores on the EORTC-QLQ-C30 in Patients with Stage IV Non-Small Cell Lung Cancer receiving Immunotherapy or Chemo-Immunotherapy, Overall and by Current Immunotherapy vs. Chemo-immunotherapy

| Scale                     | Overall<br>Sample (N =<br>60) | Current Treatment                      |                                     | <i>p</i> |
|---------------------------|-------------------------------|----------------------------------------|-------------------------------------|----------|
|                           | Mean (SD)                     | Immunotherapy<br>(n = 31) <sup>a</sup> | Chemo-<br>immunotherapy<br>(n = 28) |          |
| <b>Global Health</b>      | 62.6 (21.5)                   | 58.3 (23.1)                            | 68.2 (18.6)                         | .08      |
| <b>Function Subscales</b> |                               |                                        |                                     |          |
| Cognitive<br>Function     | 81.7 (21.0)                   | 79.0 (21.5)                            | 85.7 (19.6)                         | .22      |
| Emotional<br>Function     | 79.7 (20.1)                   | 79.6 (22.0)                            | 80.4 (18.3)                         | .88      |
| Physical<br>Function      | 74.5 (20.7)                   | 71.6 (20.3)                            | 78.0 (21.3)                         | .24      |
| Social Function           | 73.6 (26.3)                   | 76.3 (21.4)                            | 71.4 (31.1)                         | .49      |
| Role Function             | 70.0 (32.3)                   | 66.7 (33.3)                            | 74.4 (31.6)                         | .36      |
| <b>Symptom Subscales</b>  |                               |                                        |                                     |          |
| Fatigue                   | 39.6 (28.5)                   | 42.7 (30.6)                            | 35.7 (26.4)                         | .36      |
| Insomnia                  | 37.9 (36.6)                   | 40.2 (40.2)                            | 34.5 (33.3)                         | .56      |
| Dyspnea                   | 35.0 (29.7)                   | 38.7 (31.1)                            | 31.0 (28.6)                         | .32      |
| Financial                 | 32.8 (36.0)                   | 37.6 (36.3)                            | 28.6 (36.0)                         | .34      |
| Pain                      | 28.1 (30.3)                   | 31.7 (33.7)                            | 23.2 (26.2)                         | .29      |
| Appetite                  | 23.3 (31.5)                   | 33.3 (36.5)                            | 11.9 (20.7)                         | .007     |
| Constipation              | 18.3 (24.9)                   | 17.2 (22.6)                            | 20.2 (27.7)                         | .65      |
| Nausea                    | 11.4 (18.3)                   | 14.5 (22.3)                            | 7.1 (11.5)                          | .11      |
| Diarrhea                  | 8.3 (20.0)                    | 8.6 (17.1)                             | 8.3 (23.4)                          | .96      |

Note. EORTC-QLQ-C30 = European Organisation for Research and Treatment of Cancer Quality of Life Questionnaire Core 30. ECOG = Eastern Cooperative Oncology Group. Statistical significance was tested with independent samples t-tests.

<sup>a</sup>Excluded one patient who was on two immunotherapy agents.

**Supplemental Table 3**

Means, Standard Deviations, and Observed Range for each NCI-PRO-CTCAE™ Item and Follow-up Items

| <b>NCI-PRO-CTCAE™</b>                     | <b>Mean (SD)</b> | <b>Observed Range</b> |
|-------------------------------------------|------------------|-----------------------|
| Constipation severity (n = 60)            | 0.7 (1.00)       | 0-4                   |
| Diarrhea frequency (n = 60)               | 0.5 (0.9)        | 0-3                   |
| Bowel incontinence frequency (n = 60)     | 0.1 (0.4)        | 0-2                   |
| Bowel incontinence interference (n = 5)   | 1.4 (0.9)        | 0-2                   |
| Abdominal pain frequency (n = 60)         | 0.5 (0.9)        | 0-3                   |
| Abdominal pain severity (n = 19)          | 1.4 (0.9)        | 0-4                   |
| Abdominal pain interference (n = 19)      | 0.9 (1.2)        | 0-4                   |
| Fatigue severity (n = 60)                 | 1.6 (1.0)        | 0-4                   |
| Fatigue interference (n = 52)             | 1.5 (1.1)        | 0-4                   |
| Pain frequency (n = 60)                   | 1.5 (1.2)        | 0-4                   |
| Pain severity (n = 44)                    | 1.8 (1.0)        | 0-4                   |
| Pain interference (n = 44)                | 1.1 (1.2)        | 0-4                   |
| Cough severity (n = 60)                   | 1.1 (1.0)        | 0-4                   |
| Cough interference (n = 41)               | 0.7 (0.8)        | 0-3                   |
| Wheezing (n = 60)                         | 0.6 (0.9)        | 0-4                   |
| Shortness of breath severity (n = 60)     | 1.0 (1.0)        | 0-4                   |
| Shortness of breath interference (n = 41) | 1.3 (1.2)        | 0-4                   |
| Dry skin severity (n = 58)                | 1.0 (0.8)        | 0-4                   |
| Itchy skin severity (n = 58)              | 0.8 (0.9)        | 0-4                   |
| Muscle ache frequency (n = 60)            | 1.1 (1.1)        | 0-3                   |
| Muscle ache severity (n = 36)             | 1.5 (0.7)        | 0-3                   |
| Muscle ache interference (n = 36)         | 0.9 (1.0)        | 0-3                   |
| Joint pain frequency (n = 60)             | 1.0 (1.2)        | 0-4                   |
| Joint pain severity (n = 31)              | 1.6 (0.8)        | 0-4                   |

|                                           |           |     |
|-------------------------------------------|-----------|-----|
| Joint pain interference (n = 31)          | 1.2 (1.1) | 0-4 |
| Decreased appetite severity (n=60)        | 0.8 (1.1) | 0-4 |
| Decreased appetite interference (n=28)    | 0.9 (1.2) | 0-4 |
| Arm or leg swelling frequency (n = 60)    | 0.4 (0.9) | 0-4 |
| Arm or leg swelling severity (n = 15)     | 1.1 (0.8) | 0-3 |
| Arm or leg swelling interference (n = 15) | 0.5 (1.1) | 0-4 |
| Nausea frequency (n=60)                   | 0.6 (1.0) | 0-4 |
| Nausea severity (n=20)                    | 1.5 (0.8) | 1-4 |

---

Note. Note. NCI-PRO-CTCAE™ = National Cancer Institute Patient Reported Outcomes version of the Common Terminology Criteria for Adverse Events.™

Items were scored such that follow-up questions were marked as missing if the initial question was marked as “0” (e.g., a patient could not rate interference if they did not indicate presence of a symptom on a prior question). Other symptoms reported by patients on the free response PRO item included: dry eyes, dry mouth, and loss of taste (n = 1), stiffness/numbness in jaw (n = 1), hot flashes (n = 1), left hip/leg soreness (n = 1), and sadness and anxiety (n = 1).

**Supplemental Table 4.**

Number and Proportion of Patients with Stage IV Non-Small Cell Lung Cancer receiving Immunotherapy or Chemo-immunotherapy Reporting at Least Moderate/Occasional Past Week Symptoms on the NCI-PRO-CTCAE™, Overall and by Current Immunotherapy vs. Chemo-immunotherapy

| Past Week Symptoms –<br>NCI PRO-CTCAE™ | Overall Sample<br>(N = 60)                        | Current Treatment                               |                                              | p    |
|----------------------------------------|---------------------------------------------------|-------------------------------------------------|----------------------------------------------|------|
|                                        | n (%) At Least<br>Moderate/Occasio<br>nal Symptom | Immunotherapy<br>(n = 31) <sup>a</sup><br>n (%) | Chemo-<br>immunotherapy<br>(n = 28)<br>n (%) |      |
| Constipation severity                  | 13 (21.7)                                         | 8 (25.8)                                        | 5 (17.9)                                     | .46  |
| Diarrhea frequency                     | 11 (18.3)                                         | 5 (16.1)                                        | 6 (21.4)                                     | .60  |
| Bowel incontinence<br>frequency        | 2 (3.3)                                           | 1 (3.2)                                         | 1 (3.6)                                      | 1.0  |
| Abdominal pain frequency               | 7 (11.7)                                          | 7 (22.6)                                        | 0 (0)                                        | .01  |
| Fatigue severity                       | 30 (50.0)                                         | 18 (58.1)                                       | 11 (39.3)                                    | .15  |
| Pain frequency                         | 25 (41.7)                                         | 15 (48.4)                                       | 9 (32.1)                                     | .20  |
| Cough severity                         | 15 (25.0)                                         | 9 (29.0)                                        | 6 (21.4)                                     | .50  |
| Wheezing severity                      | 7 (11.7)                                          | 4 (12.9)                                        | 3 (10.7)                                     | 1.0  |
| Shortness of breath<br>severity        | 14 (23.3)                                         | 10 (32.3)                                       | 4 (14.3)                                     | .11  |
| Rash (yes/no)                          | 16 (26.7)                                         | 7 (22.3)                                        | 8 (28.6)                                     | .60  |
| Dry skin severity                      | 12 (20.7)                                         | 7 (24.1)                                        | 4 (14.3)                                     | .35  |
| Itchy skin severity                    | 13 (22.4)                                         | 8 (26.7)                                        | 4 (14.8)                                     | .27  |
| Muscle ache frequency                  | 24 (40.0)                                         | 14 (45.2)                                       | 10 (35.7)                                    | .46  |
| Joint pain frequency                   | 20 (33.3)                                         | 12 (38.7)                                       | 7 (25.0)                                     | .26  |
| Decreased appetite<br>severity         | 14 (23.3)                                         | 11 (35.5)                                       | 3 (10.7)                                     | .03  |
| Arm or leg swelling<br>severity        | 7 (11.7)                                          | 1 (3.2)                                         | 6 (21.4)                                     | .045 |
| Nausea frequency                       | 10 (16.7)                                         | 7 (22.6)                                        | 2 (7.1)                                      | .15  |

Note. NCI-PRO-CTCAE™ = National Cancer Institute Patient Reported Outcomes version of the Common Terminology Criteria for Adverse Events™. Statistical significance was tested with chi-square or Fisher's exact tests.

**Supplemental Table 5**

Number and Proportion of Patients Reporting High Levels of Past Week Symptoms on the NCI-PRO-CTCAE™ in the Overall Sample (N = 60)

| <b>Past Week Symptoms –<br/>NCI-PRO-CTCAE™</b> | <b>n (%) Endorsing at severe/frequently to<br/>very severe/almost constantly</b> |
|------------------------------------------------|----------------------------------------------------------------------------------|
| Constipation severity                          | 3 (5.0)                                                                          |
| Diarrhea frequency                             | 3 (5.0)                                                                          |
| Bowel incontinence frequency                   | 0 (0)                                                                            |
| Abdominal pain frequency                       | 4 (6.7)                                                                          |
| Fatigue severity                               | 8 (13.3)                                                                         |
| Pain frequency                                 | 16 (26.7)                                                                        |
| Cough severity                                 | 4 (6.7)                                                                          |
| Wheezing                                       | 2 (3.3)                                                                          |
| Shortness of breath severity                   | 4 (6.7)                                                                          |
| Dry skin severity                              | 2 (3.3)                                                                          |
| Itchy skin severity                            | 2 (3.3)                                                                          |
| Muscle ache frequency                          | 8 (13.3)                                                                         |
| Joint pain frequency                           | 9 (15.0)                                                                         |
| Decreased appetite severity                    | 5 (8.3)                                                                          |
| Arm or leg swelling frequency                  | 3 (5.0)                                                                          |
| Nausea frequency                               | 4 (6.7)                                                                          |

Note. NCI-PRO-CTCAE™ = National Cancer Institute Patient Reported Outcomes version of the Common Terminology Criteria for Adverse Events™
